# Supplementary material for: Mesophotic Reefs of the Largest Brazilian Coastal Protected Area: Mapping, Characterization and Biodiversity
Source: MDPI journal article supplement (doi:10.3390/d14090760), 2022-09-15
Supplement: s1 [file s1]

Archive with 1 entries (1 files):
- diversity-1838034-supplementary.pdf
