# Supplementary material for: Mesophotic Reefs of the Largest Brazilian Coastal Protected Area: Mapping, Characterization and Biodiversity
Source: MDPI journal article supplement (doi:10.3390/d14090760), 2022-09-15
Supplement: s1 [file s1 › diversity-1838034-supplementary.pdf]

Supplementary material

Table S1. Minimum, average and maximum depths by applied methodology.

| Methodology   | Minimum | Medium | Maximum |
|---------------|---------|--------|---------|
| Belt transect | 31      | 33.75  | 36.5    |
| BRUV          | 31      | 35     | 55      |
| ROV           | 31      | 35     | 55      |

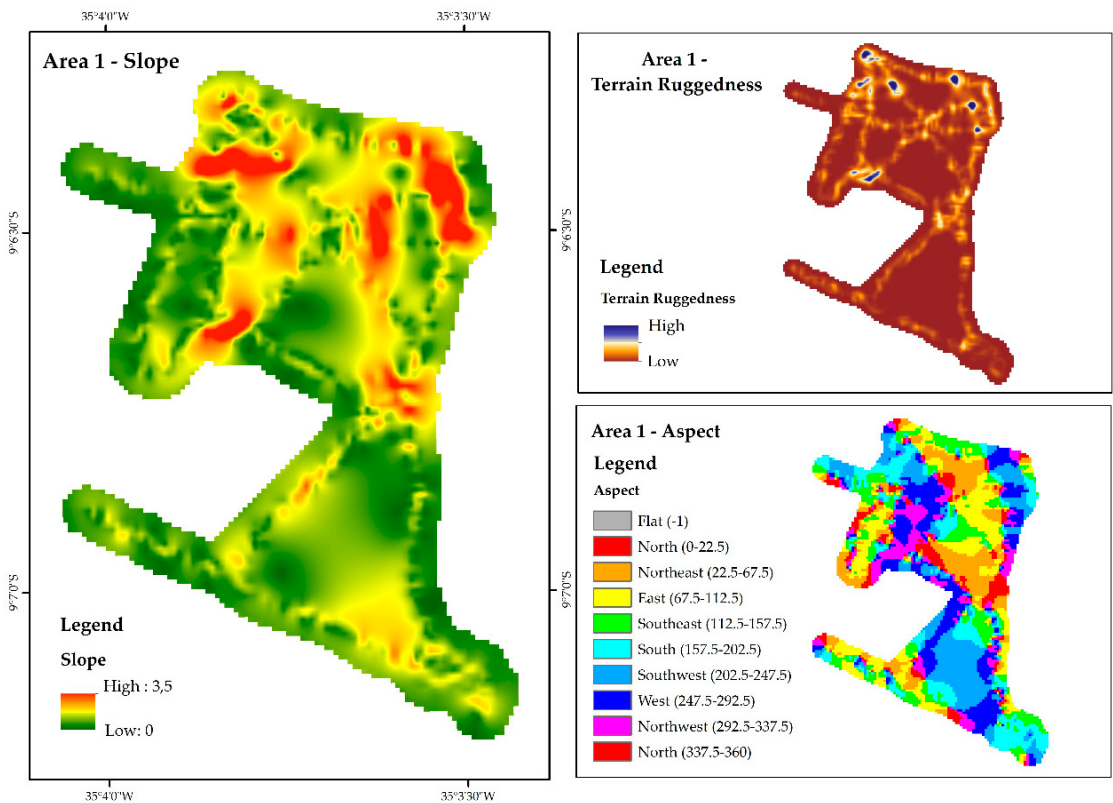

Figure S1. Slope, Terrain Ruggedness and Aspect of area 1.

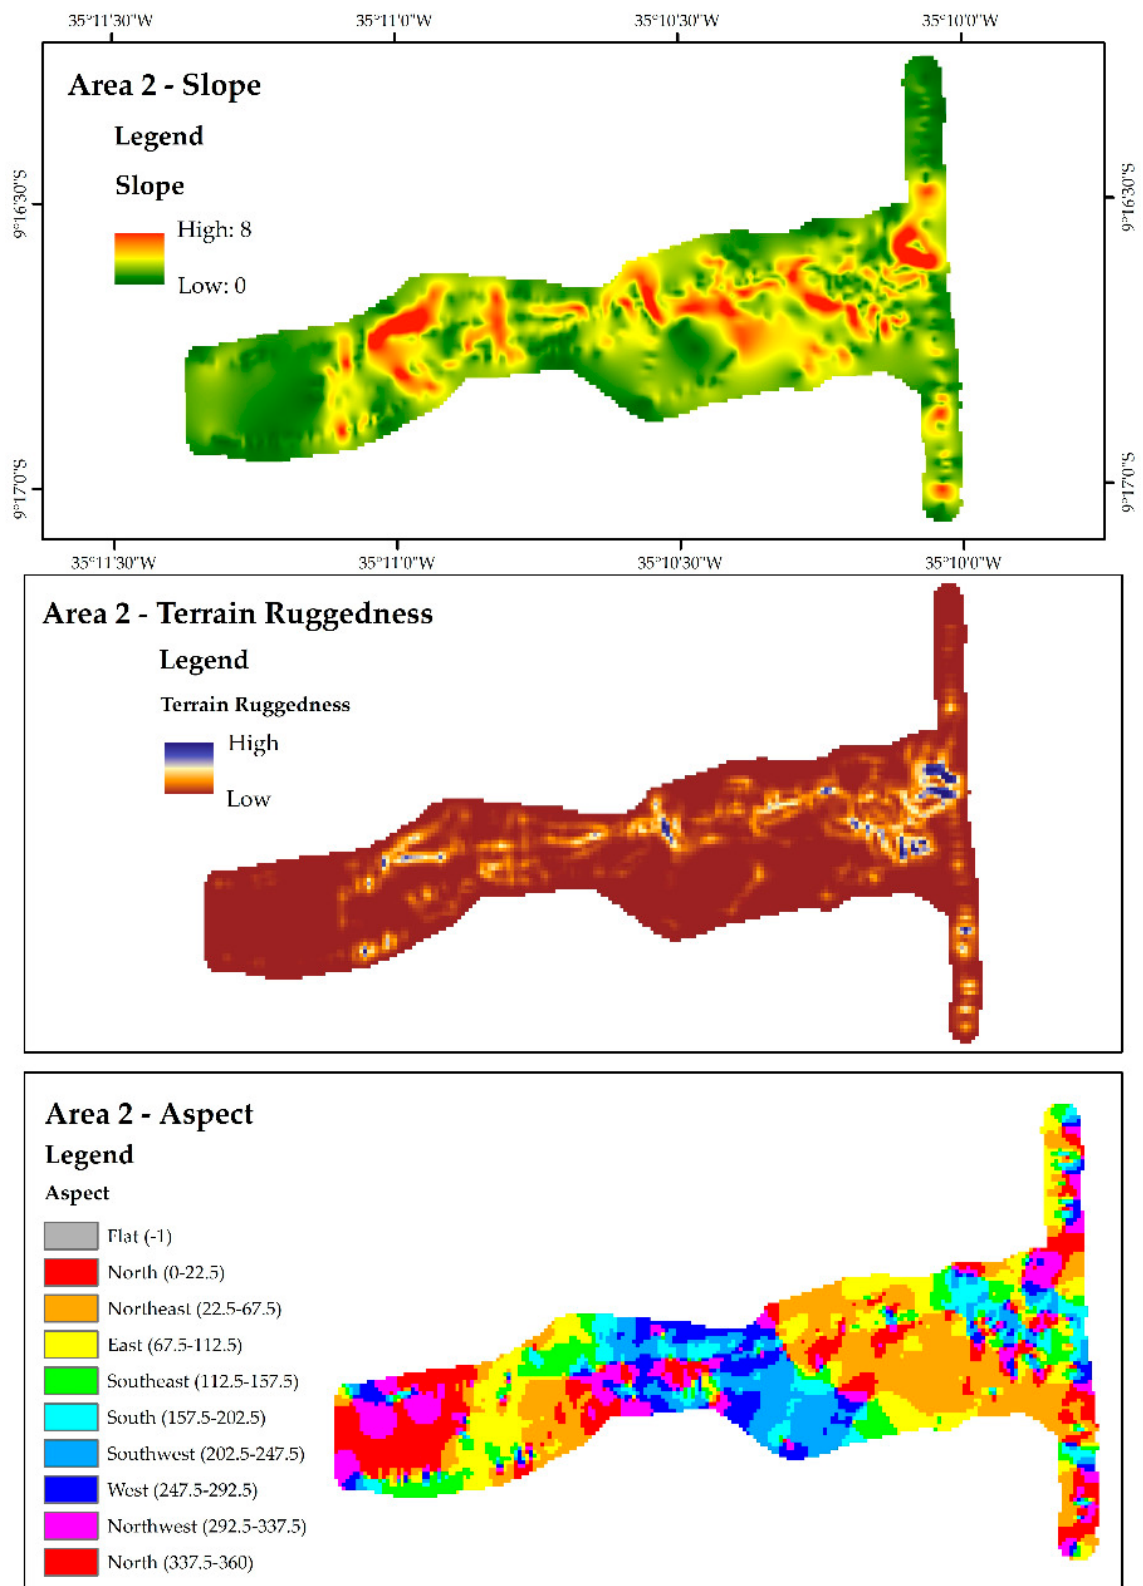

Figure S2. Slope, Terrain Ruggedness and Aspect of area 2.
